# Supplementary material for: IDO1+ Paneth cells promote immune escape of colorectal cancer
Source: PubMed Central journal article supplement (PMC7244549; doi:10.1038/s42003-020-0989-y), 2020-05-22
Supplement: 42003_2020_989_MOESM6_ESM.pdf [file 42003_2020_989_MOESM6_ESM.pdf]

## Description of Additional Supplementary Files

### File Name: Supplementary Data 1

**Description:** Genes, downregulated > 2-fold in Stat1<sup>ΔIEC</sup> Apc<sup>Min</sup> tumors (compared to Stat1<sup>flox/flox</sup> Apc<sup>Min</sup> tumors). logFC: log2 fold change; FDR: false discovery rate (< 0.005).

### File Name: Supplementary Data 2

**Description:** Genes, upregulated > 2-fold in Stat1<sup>ΔIEC</sup> Apc<sup>Min</sup> tumors (compared to Stat1<sup>flox/flox</sup> Apc<sup>Min</sup> tumors). logFC: log2 fold change; FDR: false discovery rate (< 0.005).

### File Name: Supplementary Data 3

**Description:** GO term enrichment analysis of RNA-seq data from Stat1<sup>flox/flox</sup> Apc<sup>Min</sup> and Stat1<sup>ΔIEC</sup> Apc<sup>Min</sup> colon tumors (FDR < 0.005). p: p value, q: FDR q-value.

### File Name: Supplementary Data 4

**Description:** GO term enrichment analysis of 529 genes, co-expressed with Stat1 in human CRC with a Spearman score > 0.5. p: p value.
